# Supplementary material for: Gravitational Energy Harvesting from Hydrostatic Water Columns
Source: Research Square preprint supplement (doi:10.21203/rs.3.rs-7340242/v1), 2025-08-12
Supplement: Supplementary file 1 [file 14ad4a0e1dc520baed736f5f.xlsx]

## Sheet: README
Section	Details
Experiment Title	Gauge Pressure Required for Resetting Submerged Annullating-System at 12m Depth
Description	This dataset records the gauge pressure (Pc) required to move the annullating-system outward from the lower piston, using compressed air, during energy harvesting experiments performed at 12 meters submergence under sea level.
Location	Field test conducted at sea, with the annullating-system suspended 12 meters below the surface using a crane.
Purpose	To measure the minimal pressure required to reset the submerged pressure-annullating piston system against gravity using compressed air.
Equipment Used	Analog manometers (0.5 bar resolution for gauge measurement, and 1.0 bar resulotion for submergence depth), underwater cameras, air hose from surface, annullating-system prototype with fixed lower piston.
Variable Definitions	Pc: Gauge pressure [bar] applied to the back chamber to initiate upward motion of the annullating-system. Trial Number: Sequential identifier for each experiment. Note: Indicates that Pc includes gravitational compensation (system weight).
Measurement Method	Pc was measured using live underwater cameras directed at the analog manometer while air was injected from the surface. The pressure at which motion initiated was recorded.
Units	Pressure: bar (gauge), Depth: meters (constant at 12 m)
Trial Details	50 repeated experiments performed under identical conditions with only minor random fluctuation due to environmental and observational variation.
Data Notes	Pc includes weight of the annullating-system, which was independently measured on land to require 0.365 bar to lift against the force of gravity.
Citing This Dataset	Sadid Gagi Peskovic, Cite as: 'Gauge Pressure Data for Submerged Reset Experiments, 2025'.

## Sheet: Raw Data
Trial Number	Gauge Pressure (Pc) [bar]	Note
1	0.502	Includes system weight (0.365 bar)
2	0.499	Includes system weight (0.365 bar)
3	0.503	Includes system weight (0.365 bar)
4	0.508	Includes system weight (0.365 bar)
5	0.499	Includes system weight (0.365 bar)
6	0.499	Includes system weight (0.365 bar)
7	0.508	Includes system weight (0.365 bar)
8	0.504	Includes system weight (0.365 bar)
9	0.498	Includes system weight (0.365 bar)
10	0.503	Includes system weight (0.365 bar)
11	0.498	Includes system weight (0.365 bar)
12	0.498	Includes system weight (0.365 bar)
13	0.501	Includes system weight (0.365 bar)
14	0.49	Includes system weight (0.365 bar)
15	0.491	Includes system weight (0.365 bar)
16	0.497	Includes system weight (0.365 bar)
17	0.495	Includes system weight (0.365 bar)
18	0.502	Includes system weight (0.365 bar)
19	0.495	Includes system weight (0.365 bar)
20	0.493	Includes system weight (0.365 bar)
21	0.507	Includes system weight (0.365 bar)
22	0.499	Includes system weight (0.365 bar)
23	0.5	Includes system weight (0.365 bar)
24	0.493	Includes system weight (0.365 bar)
25	0.497	Includes system weight (0.365 bar)
26	0.501	Includes system weight (0.365 bar)
27	0.494	Includes system weight (0.365 bar)
28	0.502	Includes system weight (0.365 bar)
29	0.497	Includes system weight (0.365 bar)
30	0.499	Includes system weight (0.365 bar)
31	0.497	Includes system weight (0.365 bar)
32	0.509	Includes system weight (0.365 bar)
33	0.5	Includes system weight (0.365 bar)
34	0.495	Includes system weight (0.365 bar)
35	0.504	Includes system weight (0.365 bar)
36	0.494	Includes system weight (0.365 bar)
37	0.501	Includes system weight (0.365 bar)
38	0.49	Includes system weight (0.365 bar)
39	0.493	Includes system weight (0.365 bar)
40	0.501	Includes system weight (0.365 bar)
41	0.504	Includes system weight (0.365 bar)
42	0.501	Includes system weight (0.365 bar)
43	0.499	Includes system weight (0.365 bar)
44	0.498	Includes system weight (0.365 bar)
45	0.493	Includes system weight (0.365 bar)
46	0.496	Includes system weight (0.365 bar)
47	0.498	Includes system weight (0.365 bar)
48	0.505	Includes system weight (0.365 bar)
49	0.502	Includes system weight (0.365 bar)
50	0.491	Includes system weight (0.365 bar)
AVERAGE	0.49886
